# Supplementary material for: Interleukin 8 is a biomarker of telomerase inhibition in cancer cells
Source: Springer Nature journal article supplement (doi:10.1186/s12885-018-4633-x), 2018-07-09

Figure S1

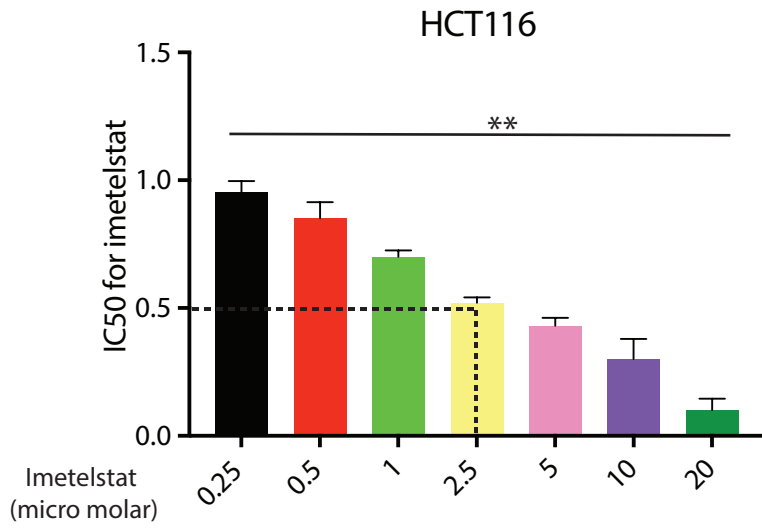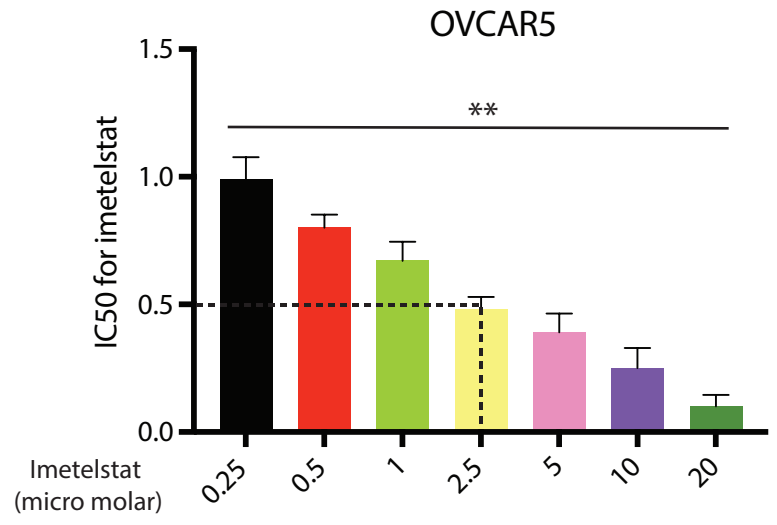

Supplement: MOESM1 [file 15927794]
